# Supplementary material for: Upfront Biology-Guided Therapy in Diffuse Intrinsic Pontine Glioma: Therapeutic, Molecular, and Biomarker Outcomes from PNOC003
Source: PubMed Central journal article supplement — Clin Cancer Res. 2022 Jul 19;28(18):3965–78. doi: 10.1158/1078-0432.CCR-22-0803 (PMC9475246; doi:10.1158/1078-0432.ccr-22-0803), 2022-07-19
Supplement: ccr-22-0803_supplemental_figure_2_suppfs2.pdf [file ccr-22-0803_supplemental_figure_2_suppfs2.pdf]

**A**

PNOC003 H3K27-altered, TP53-mutant DIPG

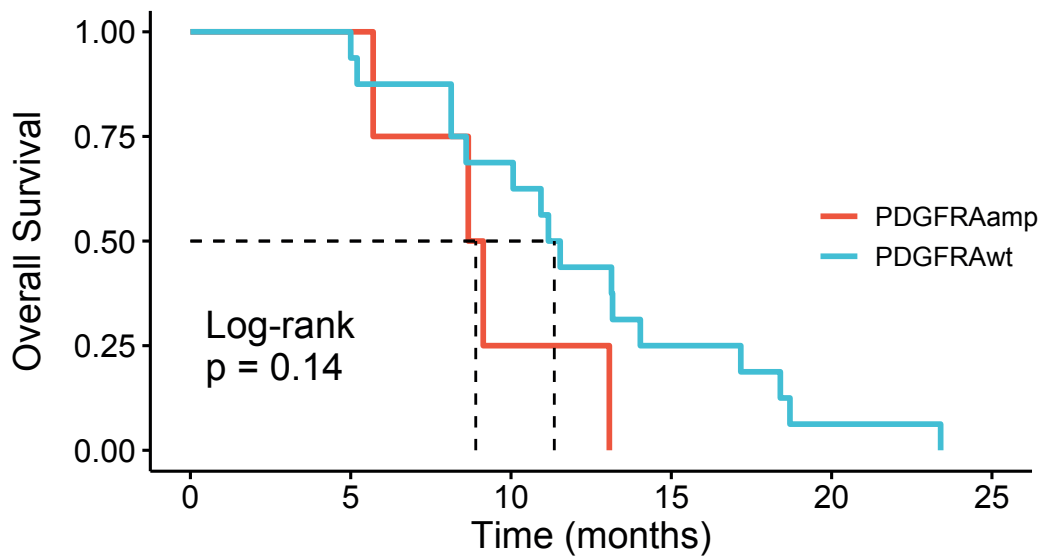

Number at risk

|           |    |    |    |    |    |
|-----------|----|----|----|----|----|
| PDGFRAamp | 4  | 1  | 0  | 0  | 0  |
| PDGFRAwt  | 16 | 11 | 4  | 1  | 0  |
|           | 5  | 10 | 15 | 20 | 25 |

Time (months)

**B**

PNOC003 H3K27-altered, TP53-mutant DIPG

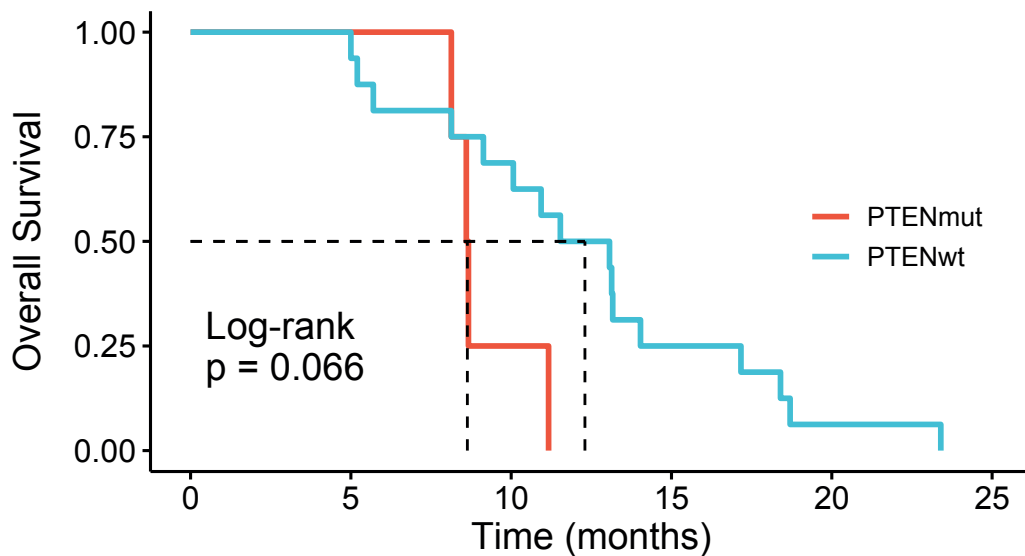

Number at risk

|         |    |    |    |    |    |
|---------|----|----|----|----|----|
| PTENmut | 4  | 1  | 0  | 0  | 0  |
| PTENwt  | 16 | 11 | 4  | 1  | 0  |
|         | 5  | 10 | 15 | 20 | 25 |

Time (months)
