# Supplementary material for: Upfront Biology-Guided Therapy in Diffuse Intrinsic Pontine Glioma: Therapeutic, Molecular, and Biomarker Outcomes from PNOC003
Source: PubMed Central journal article supplement — Clin Cancer Res. 2022 Jul 19;28(18):3965–78. doi: 10.1158/1078-0432.CCR-22-0803 (PMC9475246; doi:10.1158/1078-0432.ccr-22-0803), 2022-07-19
Supplement: ccr-22-0803_supplemental_figure_3_suppfs3.pdf [file ccr-22-0803_supplemental_figure_3_suppfs3.pdf]

| <b>Gene (#patients)</b> | <b><math>\Delta</math>volume</b> | <b><math>\Delta</math>size</b> |
|-------------------------|----------------------------------|--------------------------------|
| TP53 (17)               | +2.8                             | -2.6                           |
| MET (6)                 | -6.6                             | -3.2                           |
| H3F3A (22)              | -16.2                            | -7.3                           |
| PIK3CA (4)              | -18.5                            | -7.3                           |
| PDGFRA (4)              | -19.7                            | -4.0                           |
| SOX10 (5)               | -21.1                            | -4.1                           |
| ATRX (5)                | -22.0                            | -11.2                          |
| PPM1D (6)               | -42.0                            | -16.6                          |
