# Supplementary material for: Upfront Biology-Guided Therapy in Diffuse Intrinsic Pontine Glioma: Therapeutic, Molecular, and Biomarker Outcomes from PNOC003
Source: PubMed Central journal article supplement — Clin Cancer Res. 2022 Jul 19;28(18):3965–78. doi: 10.1158/1078-0432.CCR-22-0803 (PMC9475246; doi:10.1158/1078-0432.ccr-22-0803), 2022-07-19
Supplement: ccr-22-0803_supplemental_figure_5_suppfs5.pdf [file ccr-22-0803_supplemental_figure_5_suppfs5.pdf]

Supplemental figure 5.

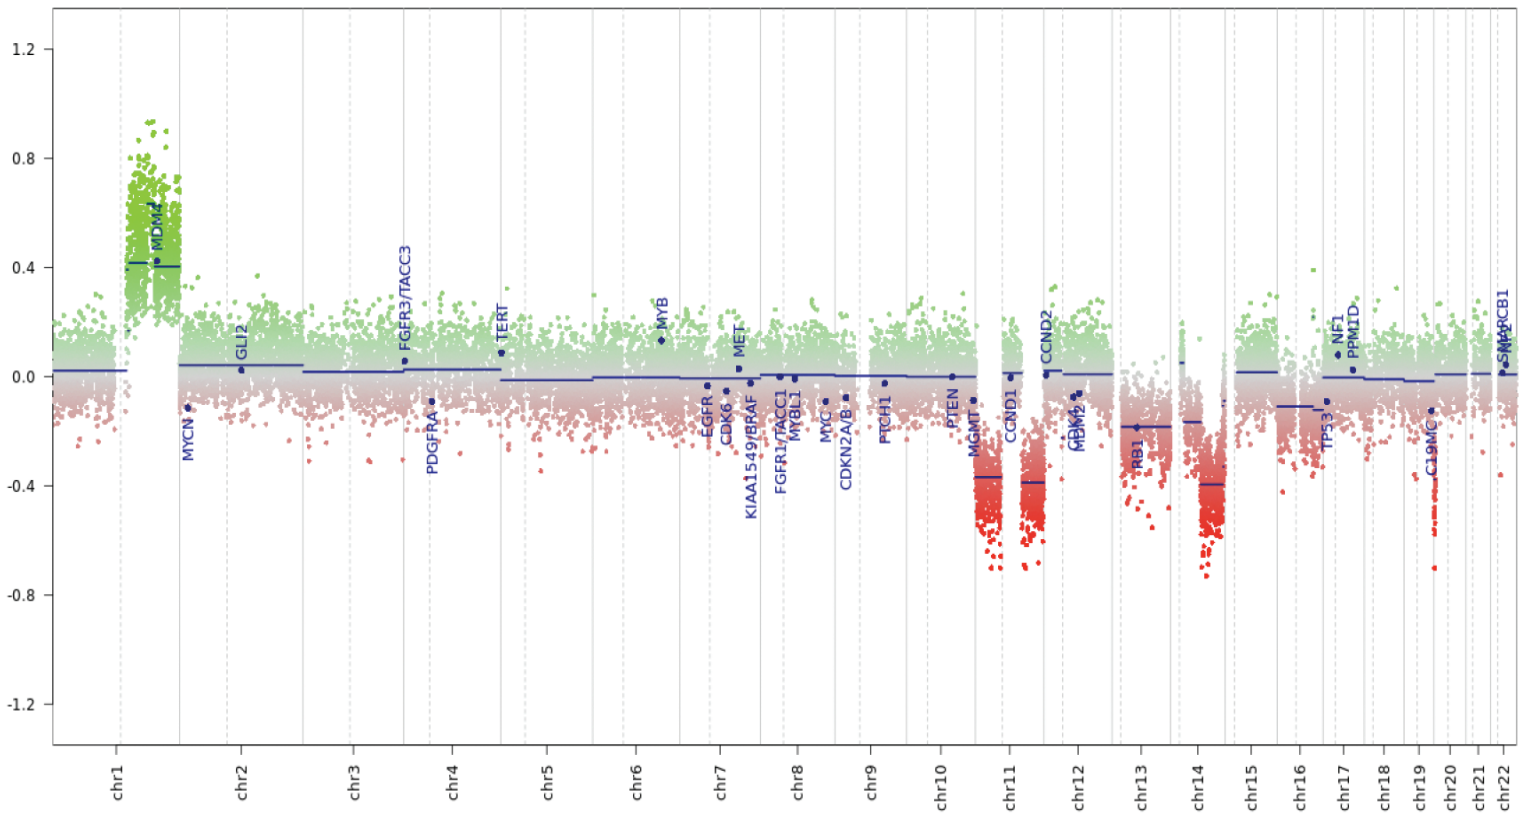

**Brain tumor methylation classifier results (v11b4)**

| Methylation classes (MCs with score >= 0.3)             | Calibrated score | Interpretation |
|---------------------------------------------------------|------------------|----------------|
| methylation class diffuse midline glioma H3 K27M mutant | 0.96             | match          |

Legend: Match (score >= 0.9) No match (score < 0.9): possibly still relevant for low tumor content and low DNA quality cases. Match to MC family member (score >= 0.5)
