# Supplementary figures and images for: Upfront Biology-Guided Therapy in Diffuse Intrinsic Pontine Glioma: Therapeutic, Molecular, and Biomarker Outcomes from PNOC003
Source: PubMed Central journal article supplement — Clin Cancer Res. 2022 Jul 19;28(18):3965–78. doi: 10.1158/1078-0432.CCR-22-0803 (PMC9475246; doi:10.1158/1078-0432.ccr-22-0803), 2022-07-19

Supplemental figure 4.

PNOC003 H3K27-altered DIPG (n=30)

A

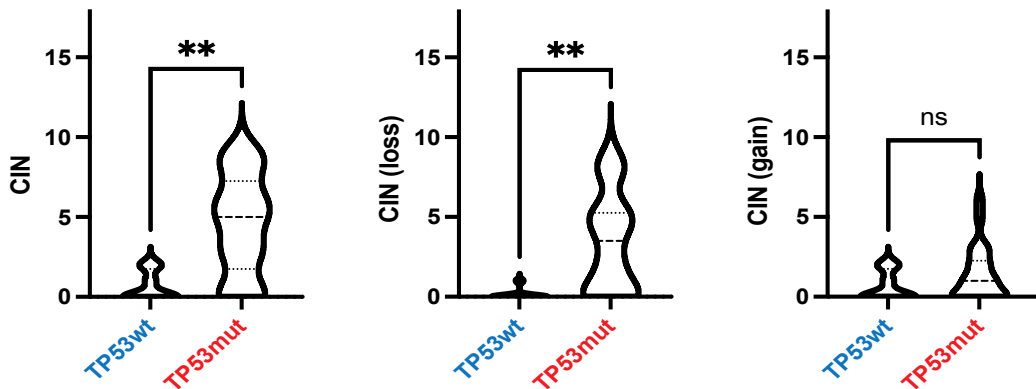

B

CBTN H3K27-altered DMG (n=21)

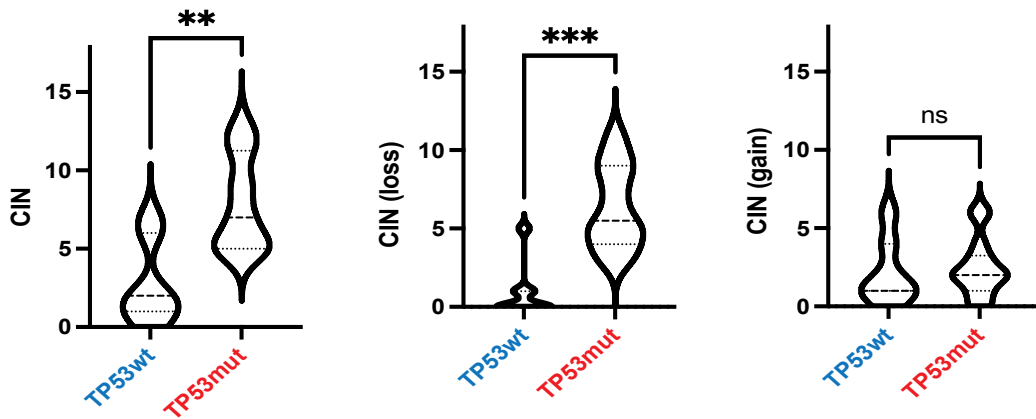

C

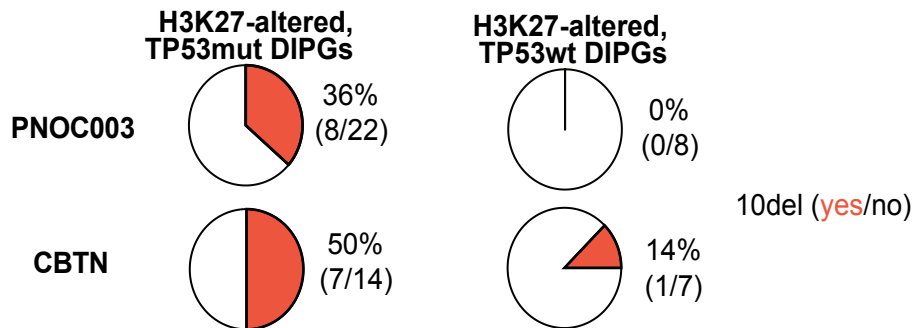

Supplement: ccr-22-0803_supplemental_figure_4_suppfs4.pdf [file ccr-22-0803_supplemental_figure_4_suppfs4.pdf]

Supplemental figure 6.

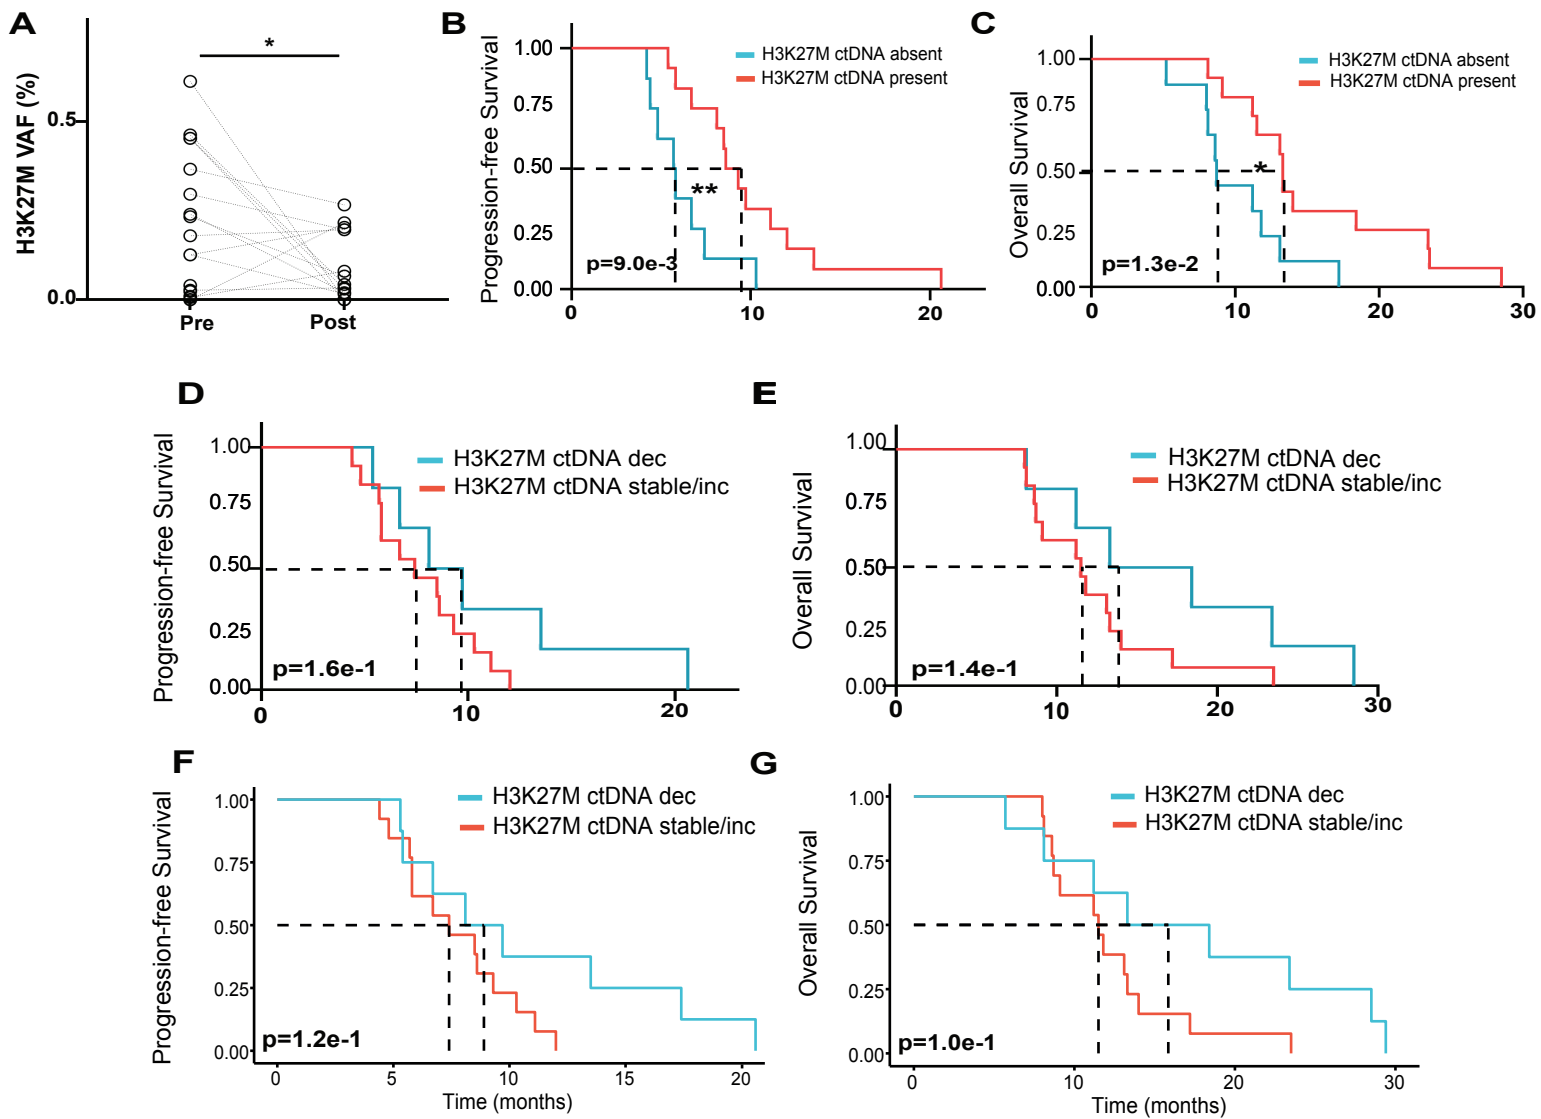

Supplement: ccr-22-0803_supplemental_figure_6_suppfs6.pdf [file ccr-22-0803_supplemental_figure_6_suppfs6.pdf]

Supplemental figure 7. **TUMOR**

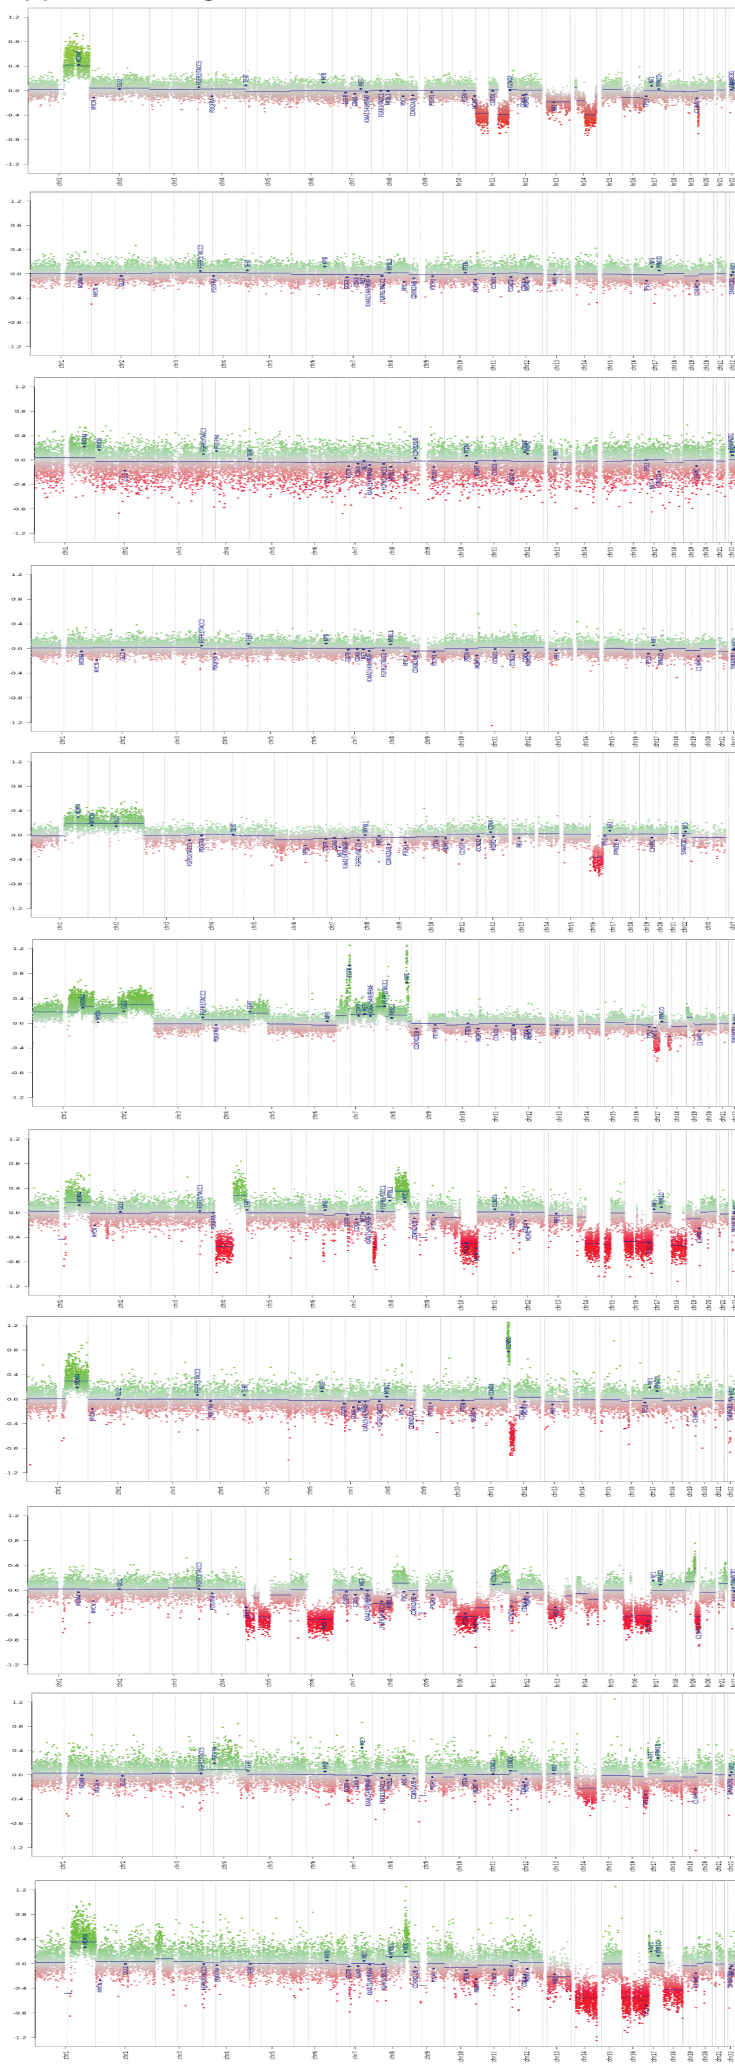

**DERIVED CELL LINE**

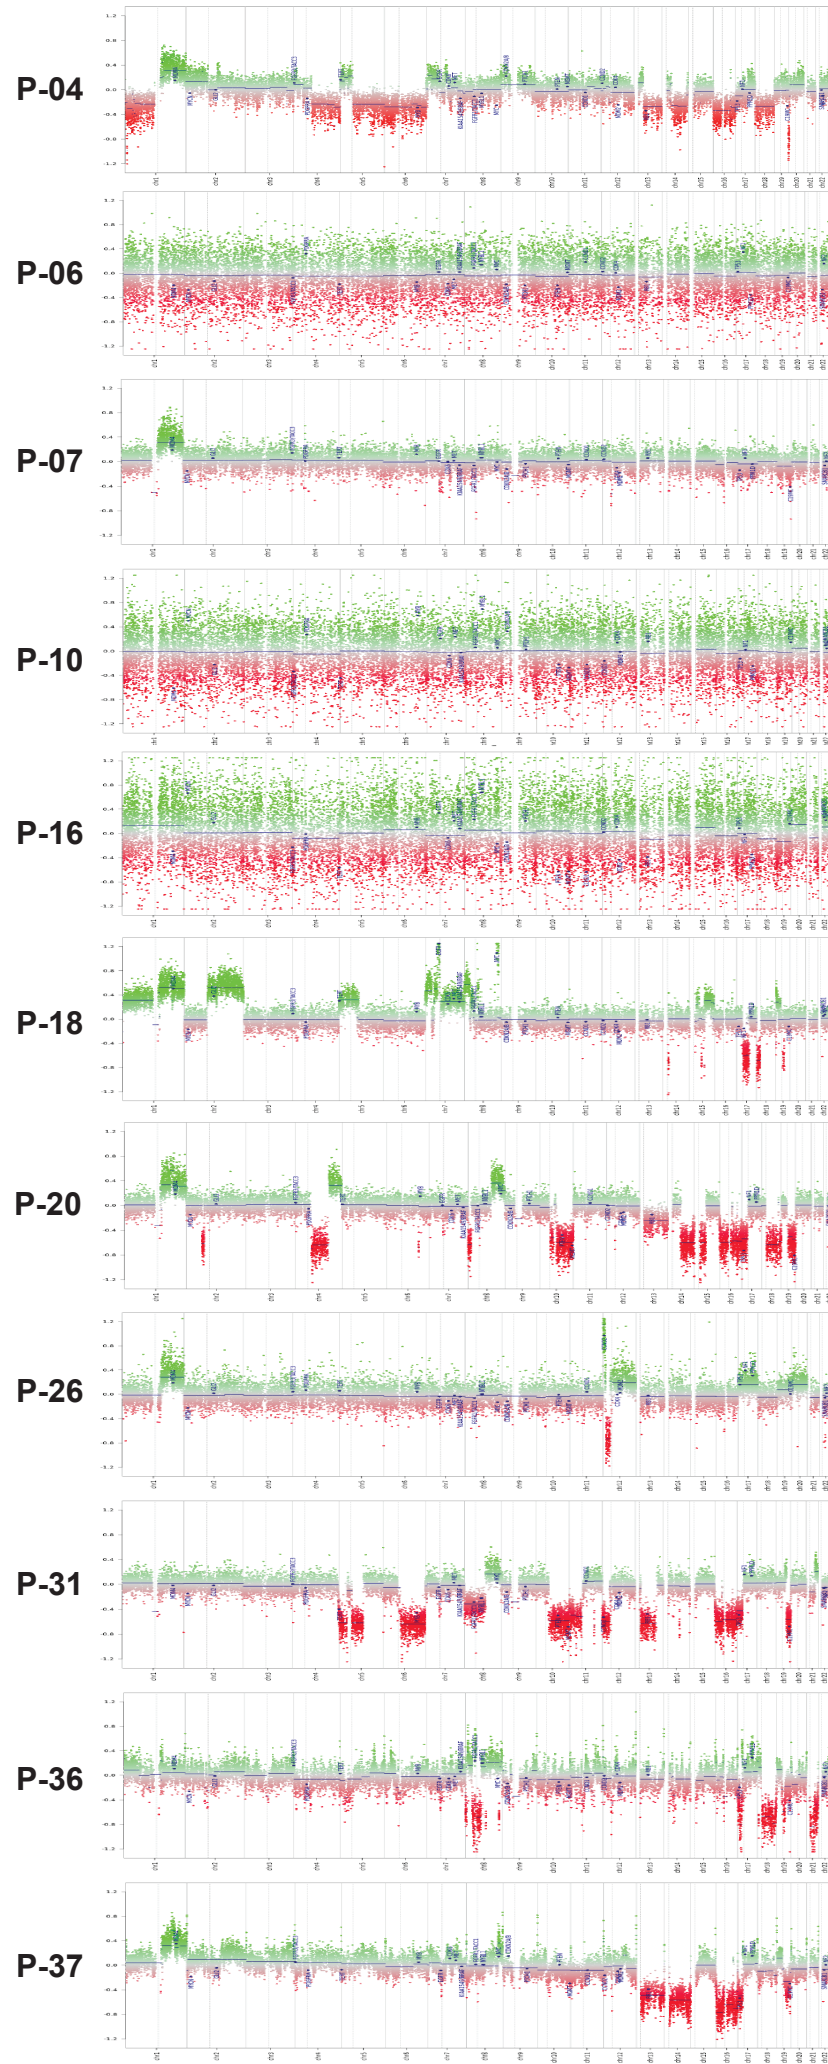

Supplement: ccr-22-0803_supplemental_figure_7_suppfs7.pdf [file ccr-22-0803_supplemental_figure_7_suppfs7.pdf]

Supplemental figure 8.

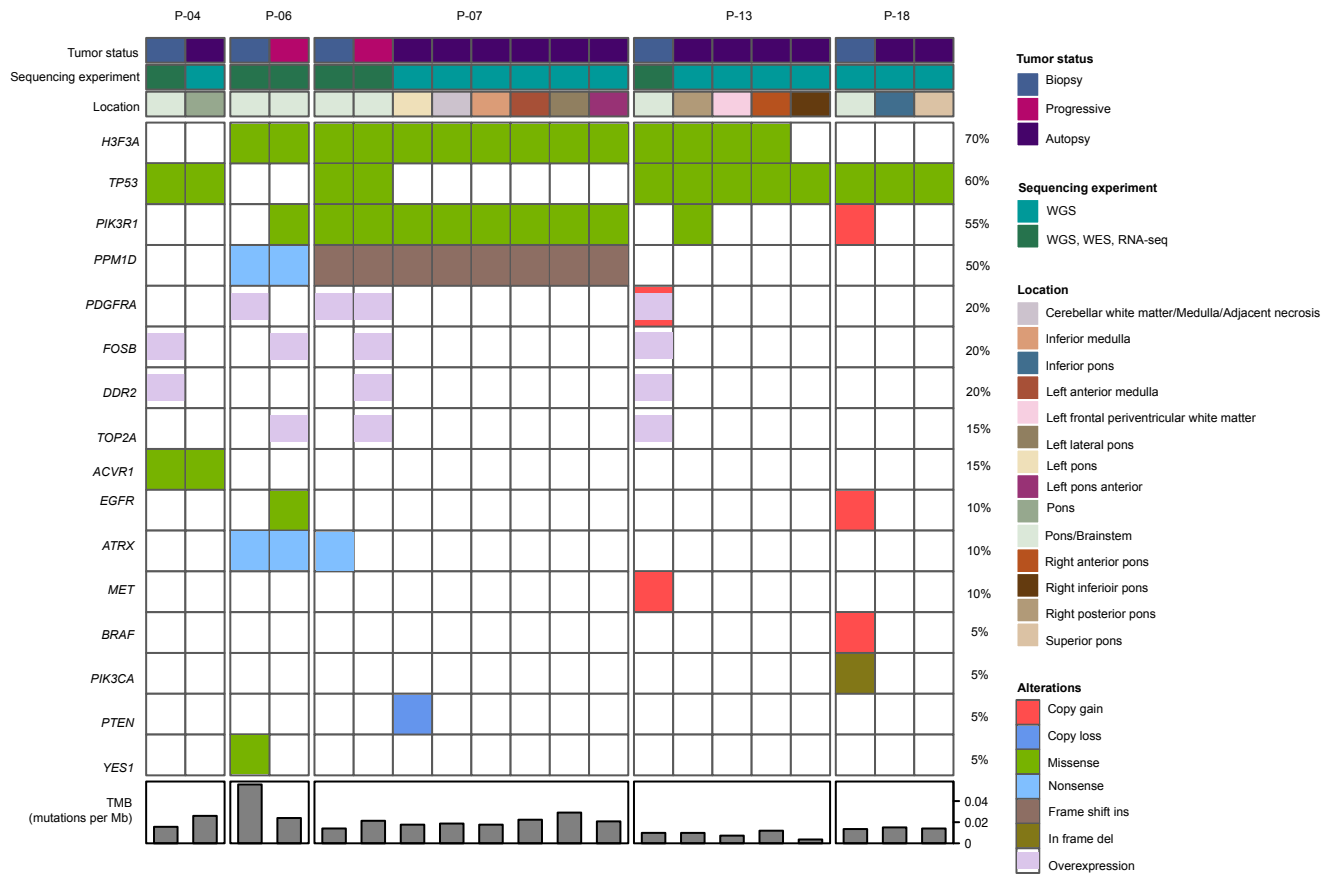

Supplement: ccr-22-0803_supplemental_figure_8_suppfs8.pdf [file ccr-22-0803_supplemental_figure_8_suppfs8.pdf]

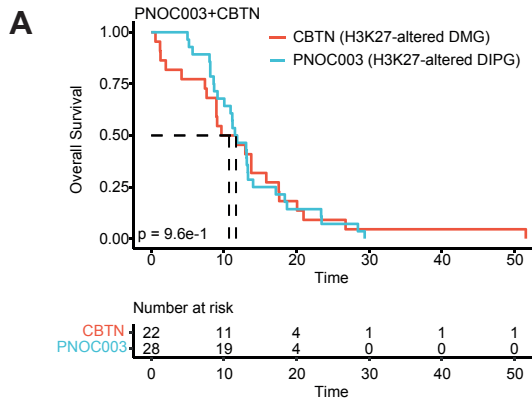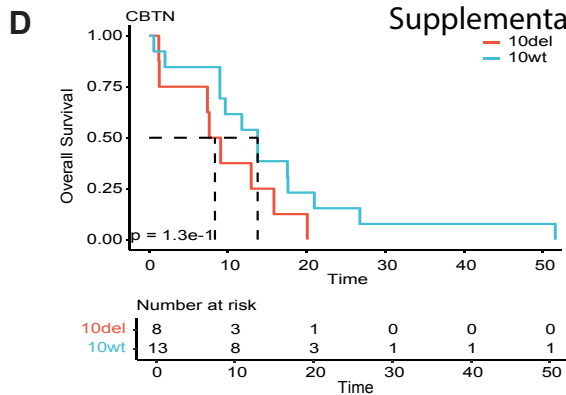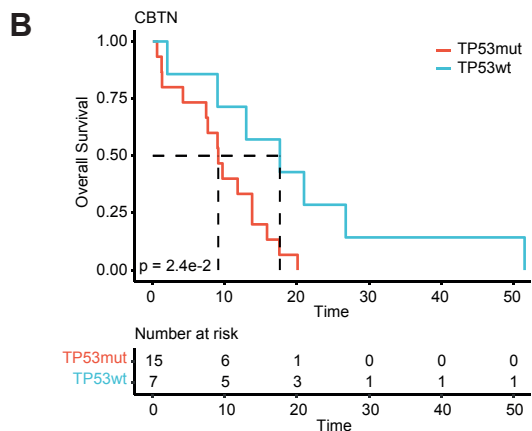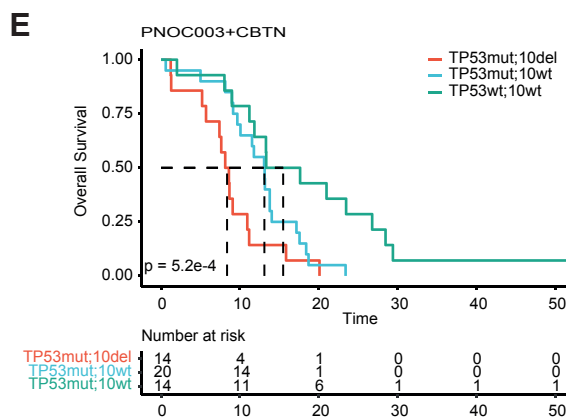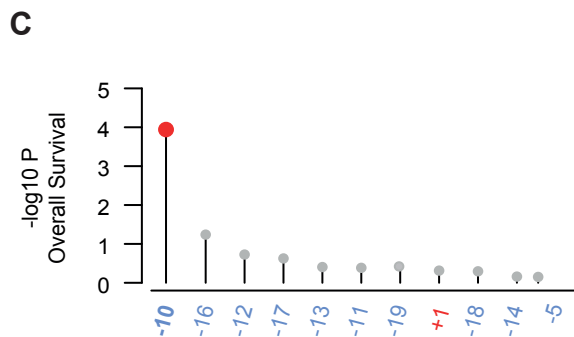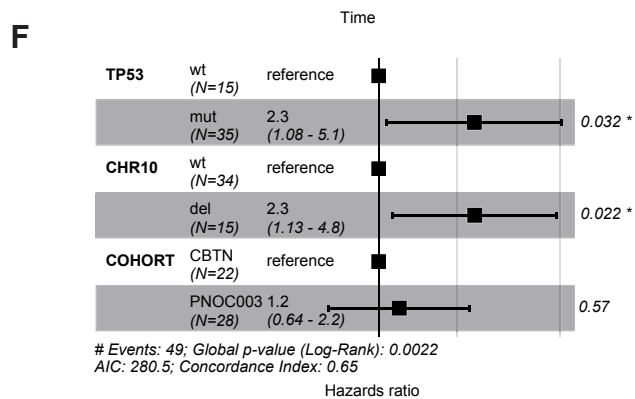

Supplement: ccr-22-0803_supplementary_figure_1_suppfs1.pdf [file ccr-22-0803_supplementary_figure_1_suppfs1.pdf]
